# Supplementary material for: The intrinsic chaperone network of Arabidopsis stem cells confers protection against proteotoxic stress
Source: PubMed Central journal article supplement (PMC8373342; doi:10.1111/acel.13446), 2021-07-30

**a**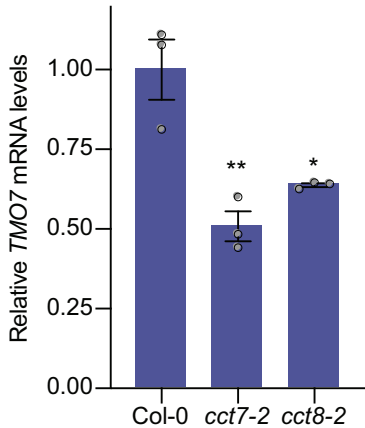**b**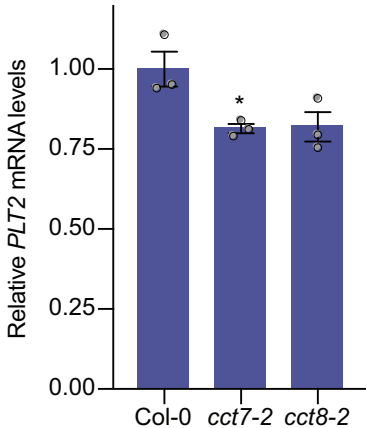

Supplement: ACEL-20-e13446-s004.pdf [file ACEL-20-e13446-s004.pdf]
