# Supplementary material for: The intrinsic chaperone network of Arabidopsis stem cells confers protection against proteotoxic stress
Source: PubMed Central journal article supplement (PMC8373342; doi:10.1111/acel.13446), 2021-07-30

**a**

Control 22 °C

37°C heat stress (HS)  
for 2 days at 4 DAG,  
recover for 5 days at  
22°C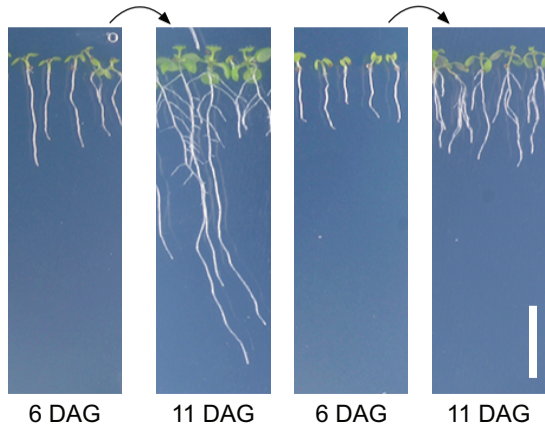**b**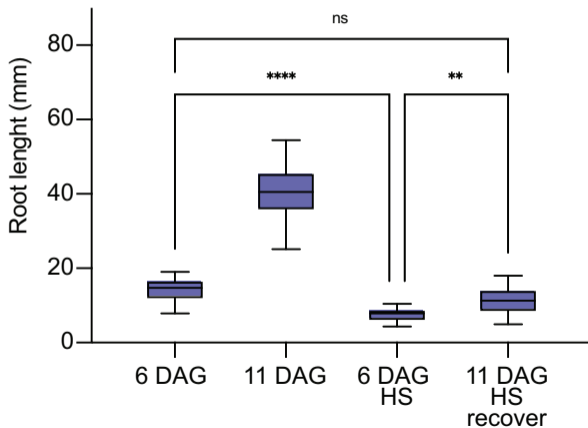

Supplement: ACEL-20-e13446-s005.pdf [file ACEL-20-e13446-s005.pdf]
