# Supplementary material for: The intrinsic chaperone network of Arabidopsis stem cells confers protection against proteotoxic stress
Source: PubMed Central journal article supplement (PMC8373342; doi:10.1111/acel.13446), 2021-07-30
Supplement: ACEL-20-e13446-s011.pdf [file ACEL-20-e13446-s011.pdf]

| Gene                          | AGI Locus | Primers used for qPCR (F/R)       | Reference                                       |
|-------------------------------|-----------|-----------------------------------|-------------------------------------------------|
| <i>CCT1</i>                   | AT3G20050 | GTC GGC CTC GAC AAG ATG           | Ahn et al., 2019. J Exp Bot. 70: 2741-2757      |
|                               |           | CGA CCT CCAACA TCC TAA GAA        |                                                 |
| <i>CCT2</i>                   | AT5G20890 | CTAAGA TTC ACC CTA TGA CCA TCA    | Ahn et al., 2019. J Exp Bot. 70: 2741-2757      |
|                               |           | TTC AGT AAA GCA TTA CGA GCA CA    |                                                 |
| <i>CCT3</i>                   | AT5G26360 | CGC TCA TCC TGC AGC TAA GT        | Ahn et al., 2019. J Exp Bot. 70: 2741-2757      |
|                               |           | ACC AGC TAG AAC AAT AAC AGA CGT T |                                                 |
| <i>CCT4</i>                   | AT3G18190 | AGT GAG CAAAAG GTT TTT GAT TG     | Ahn et al., 2019. J Exp Bot. 70: 2741-2757      |
|                               |           | ACC GAG CTG CCT TGA GAG           |                                                 |
| <i>CCT5</i>                   | AT1G24510 | TTG CTC ACT TGC GGT TGAT T        | Ahn et al., 2019. J Exp Bot. 70: 2741-2757      |
|                               |           | GCA AAC GCC CTA ATT GCA TA        |                                                 |
| <i>CCT6A</i>                  | AT3G02530 | AGT GCC TAA GAC GCT TGC TG        | Ahn et al., 2019. J Exp Bot. 70: 2741-2757      |
|                               |           | TCC TTT GTC ATG CTC ACT CG        |                                                 |
| <i>CCT6B</i>                  | AT5G16070 | GAA AGC CTG AGG AAG CTA TTG A     | Ahn et al., 2019. J Exp Bot. 70: 2741-2757      |
|                               |           | GAA CAA GCC CCT CAA CCA           |                                                 |
| <i>CCT7</i>                   | AT3G11830 | CGACTGAAGCGGCTTGCCTCAT            | This study                                      |
|                               |           | TATCGCCTTCGCATTCCACGGC            |                                                 |
| <i>CCT8</i>                   | AT3G03960 | GTC GCC CAT TTG AAG CTT AG        | Ahn et al., 2019. J Exp Bot. 70: 2741-2757      |
|                               |           | CTC GTT TCT TGC AAT CGT GA        |                                                 |
| <i>TMO7</i>                   | AT1G74500 | CGGGAAGAAGATCACGTTTCGAGGC         | This study                                      |
|                               |           | GGAACGACGACTGTCCCTGAGC            |                                                 |
| <i>PLT2</i>                   | AT1G51190 | GGTAGGGTATGGAATAATTAGC            | Durgaprasad et al., 2019. Cell Rep. 29: 453-463 |
|                               |           | CCTAAAAAGACTAACCCTCGAG            |                                                 |
| <i>EF1<math>\alpha</math></i> | AT5G60390 | CTGGAGGTTTTGAGGCTGGTAT            | Wendrich et al., 2017. PNAS. 114: E8922-E8929   |
|                               |           | CCAAGGGTGAAAGCAAGAAGA             |                                                 |
| <i>PP2A</i>                   | AT1G13320 | TAACGTGGCCAAAATGATGC              | Roth et al., 2018. Plant Cell. 30: 1309-1321    |
|                               |           | GTTCTCCACAACCGCTTGGT              |                                                 |
